# Supplementary material
Source: Elsevier journal article supplement (https://www.sciencedirect.com/science/article/pii/S2173572717300905)
Supplement: mmc2 [file S2173572717300905:mmc2.docx]

**Tabla 2.** Otras variables clínicas y de laboratorio.

| **Variable** | **TV/FV y/o muerte (media±DE)** | | **Diferencia de medias** | **IC 95%** | | **p** |
| --- | --- | --- | --- | --- | --- | --- |
| **Sí** | **No** | **Inferior** | **Superior** |
| **Variables de laboratorio** |  |  |  |  |  |  |
| Hemoglobina (g/L) | 119,5±14,8 | 122,9±12,5 | -3,4 | -7,2 | 0,5 | 0,087 |
| Leucocitos (x109/L) | 10,5±1,8 | 10,8±2,1 | -0,3 | -0,8 | 0,3 | 0,348 |
| Glucemia (mmol/L) | 11,3±2,1 | 7,2±1,9 | 4,1 | 3,5 | 4,6 | <0,001 |
| Creatinina (μmol/L) | 122,5±28,8 | 81,8±26,1 | 40,7 | 32,9 | 48,3 | <0,001 |
| Ácido úrico (mmol/L) | 311,1±103,6 | 316,8±105,9 | -5,7 | -34,6 | 23,6 | 0,709 |
| Colesterol (mmol/L) | 5,9±1,7 | 5,6±1,6 | 0,3 | -0,1 | 0,8 | 0,114 |
| Triglicéridos (mmol/L) | 2,4±1,0 | 2,2±0,9 | 0,2 | -0,1 | 0,4 | 0,249 |
| **Variables clínicas** |  |  |  |  |  |  |
| Presión sistólica (mmHg) | 107,3±41,7 | 128,1±30,1 | -20,8 | -31,2 | -10,3 | <0,001 |
| Frecuencia cardiaca (lpm) | 82,8±28,3 | 83,7±26,2 | -0,9 | -8,5 | 6,8 | 0,828 |
| FEVI (%) | 43,8±11,3 | 52,9±8,5 | -9,1 | -11,5 | -6,2 | <0,001 |
| Filtrado glomerular (ml/min)* | 46,4±8,3 | 90,8±26,1 | -44,4 | -49,3 | -39,5 | <0,001 |

* Calculado mediante la ecuación de *Chronic Kidney Disease Epidemiology Collaboration (CKD-EPI).*

DE, desviación estándar; FEVI, fracción de eyección del ventrículo izquierdo; FV, fibrilación ventricular; IC, intervalo de confianza; lpm, latidos por minuto; TV, taquicardia ventricular.
